# Supplementary material for: A NIR-driven green affording-oxygen microrobot for targeted photodynamic therapy of tumors
Source: Royal Society of Chemistry journal article supplement (doi:10.1039/d3nr03801g), 2023-11-22
Supplement: d3nr03801g1.pdf [file d3nr03801g1.pdf]

## Electronic Supplementary Information for

### **A NIR-driven green affording-oxygen microrobot for targeted photodynamic therapy of tumors**

Lishan Zhang,<sup>‡a</sup> Xiaoting Zhang,<sup>‡a</sup> Hui Ran,<sup>‡a</sup> Ze Chen,<sup>d</sup> Yicheng Ye,<sup>a</sup> Jiamiao Jiang,<sup>a</sup> Ziwei Hu,<sup>a</sup> Miral Azechi,<sup>a</sup> Fei Peng,<sup>c</sup> Hao Tian,<sup>\*a</sup> Zhili Xu<sup>\*b</sup> and Yingfeng Tu<sup>\*a</sup>

*<sup>a</sup>Guangdong Provincial Key Laboratory of New Drug Screening, School of Pharmaceutical Sciences, Southern Medical University, Guangzhou 510515, China*

*<sup>b</sup>Department of Ultrasound, Institute of Ultrasound in Musculoskeletal Sports Medicine, Guangdong Second Provincial General Hospital, Guangzhou 510317, China*

*<sup>c</sup>School of Materials Science and Engineering, Sun Yat-Sen University, Guangzhou 510275, China*

*<sup>d</sup>Guangdong Key Laboratory of Nanomedicine, CAS-HK Joint Lab of Biomaterials, Shenzhen Engineering Laboratory of Nanomedicine and Nanoformulations, Institute of Biomedicine and Biotechnology, Shenzhen Institute of Advanced Technology (SIAT), Chinese Academy of Sciences, Shenzhen 518055, China*

<sup>‡</sup>These authors contributed equally to this work.

\* E-mail: tuyingfeng1@smu.edu.cn; tianhao5588@126.com; zhili.xu@outlook.com

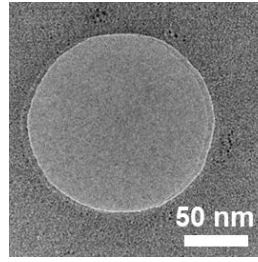

CurNPs

**Fig.S1** The TEM image of CurNPs.

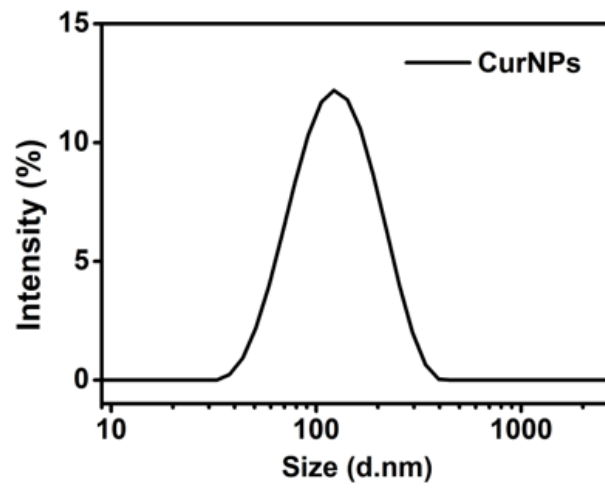

**Fig. S2** Size distribution of CurNPs.

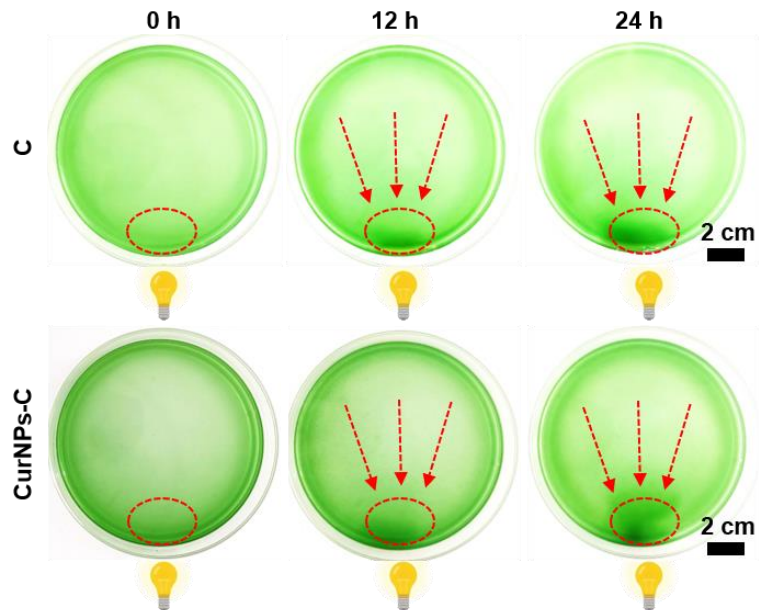

**Fig. S3** Captured photographs of the phototactic experiment of C and CurNPs-C in BG11 with white light on one side.

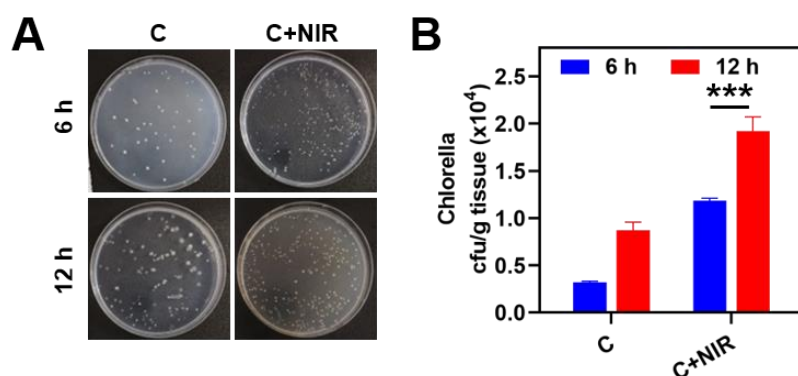

**Fig. S4** In vivo biodistribution of C. (A and B) Plate coating image photographs (A) and Colony numbers (B) of tumor tissue homogenates from 4T1 tumor-bearing mice in the C and C+NIR groups at different times after intravenous injection.

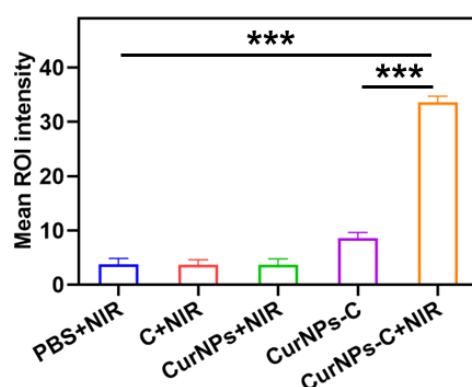

**Fig. S5** Semi-quantitative analysis of apoptosis cells in solid tumors by TUNEL stain.

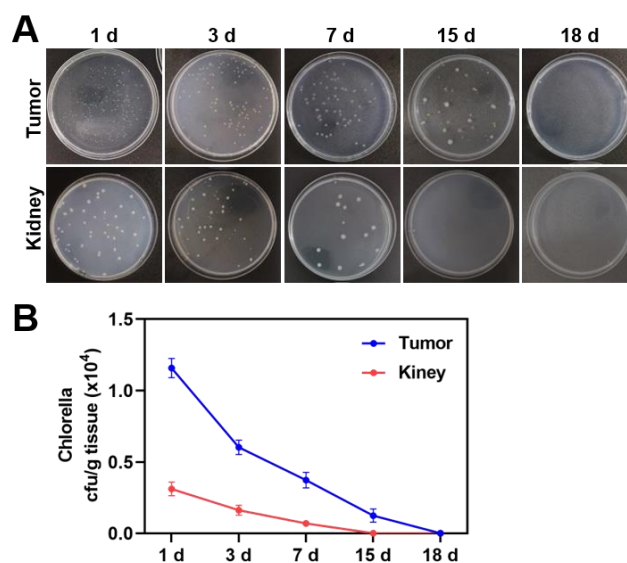

**Fig. S6** The biodegradability of CurNPs-C in 4T1 tumor-bearing mice under 660 nm laser irradiation. (A and B) Plate coating image photographs (A) and Colony numbers (B) of tumor and kidney tissue homogenates from 4T1 tumor-bearing mice in the CurNPs+NIR groups at different times after intravenous injection.

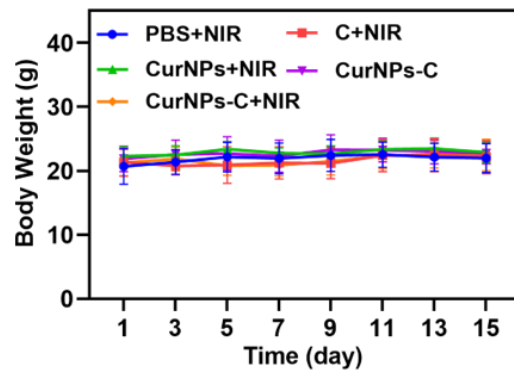

**Fig. S7** The body weight curve of the mice in different groups during tumor treatment.

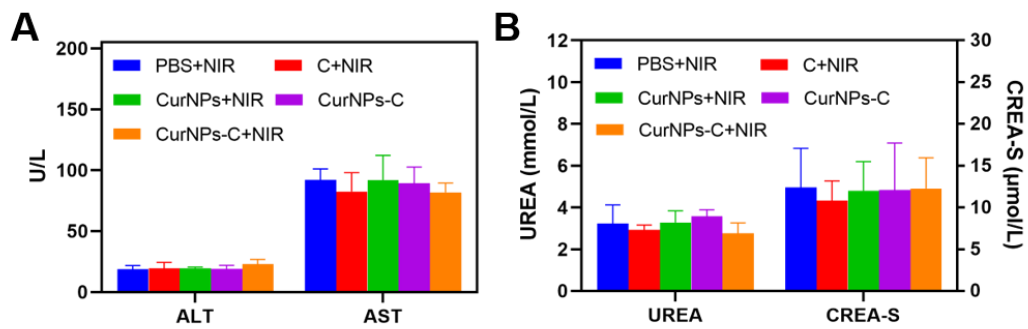

**Fig. S8** The biosafety of CurNPs-C. (A) The serum levels of ALT and AST. (B) The serum levels of UREA and CREA-S.

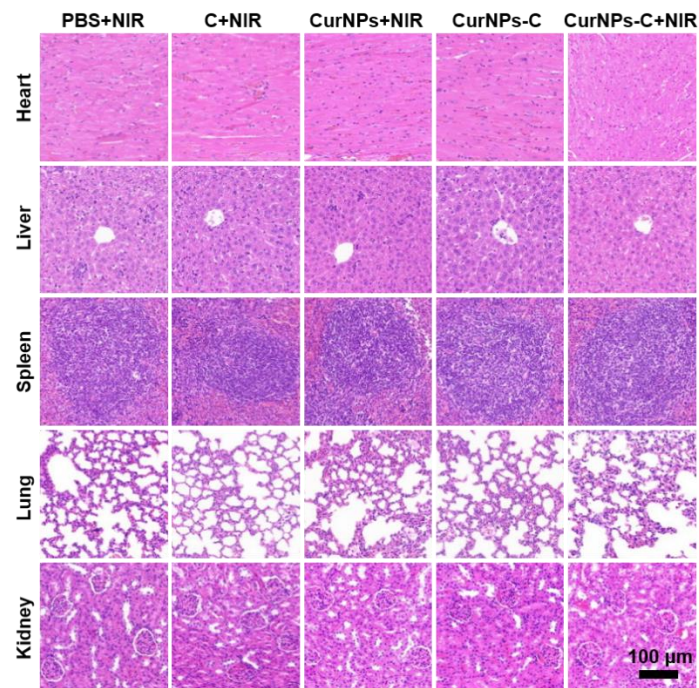

**Fig. S9** H&E images of the main organs for evaluating the biosafety of CurNPs-C at the end of the tumor treatment.

**Table S1.** P value and summary of comparison of each group in Figure 2E

| <b>Tukey's multiple comparisons test</b> | <b>P Value</b> | <b>Summary</b> |
|------------------------------------------|----------------|----------------|
| Control+NIR vs. CurNPs                   | >0.9999        | ns             |
| Control+NIR vs. C                        | >0.9999        | ns             |
| Control+NIR vs. CurNPs-C                 | 0.9511         | ns             |
| Control+NIR vs. CurNPs+NIR               | >0.9999        | ns             |
| Control+NIR vs. C+NIR                    | <0.0001        | ***            |
| Control+NIR vs. CurNPs-C+NIR             | <0.0001        | ***            |
| CurNPs vs. C                             | >0.9999        | ns             |
| CurNPs vs. CurNPs-C                      | 0.9738         | ns             |
| CurNPs vs. CurNPs+NIR                    | >0.9999        | ns             |
| CurNPs vs. C+NIR                         | <0.0001        | ***            |
| CurNPs vs. CurNPs-C+NIR                  | <0.0001        | ***            |
| C vs. CurNPs-C                           | 0.9794         | ns             |
| C vs. CurNPs+NIR                         | >0.9999        | ns             |
| C vs. C+NIR                              | <0.0001        | ***            |
| C vs. CurNPs-C+NIR                       | <0.0001        | ***            |
| CurNPs-C vs. CurNPs+NIR                  | 0.984          | ns             |
| CurNPs-C vs. C+NIR                       | <0.0001        | ***            |
| CurNPs-C vs. CurNPs-C+NIR                | <0.0001        | ***            |
| CurNPs+NIR vs. C+NIR                     | <0.0001        | ***            |
| CurNPs+NIR vs. CurNPs-C+NIR              | <0.0001        | ***            |
| C+NIR vs. CurNPs-C+NIR                   | 0.241          | ns             |

Statistical analysis was conducted by one-way ANOVA analysis followed by Tukey's post-test. The asterisk was considered as statistical significance ( $*p < 0.05$ ,  $**p < 0.01$ ,  $***p < 0.001$ ) and ns indicates no significance difference.

**Table S2.** P value and summary of comparison of each group in Figure 2F

| <b>Tukey's multiple comparisons test</b> | <b>P Value</b> | <b>Summary</b> |
|------------------------------------------|----------------|----------------|
| Control+NIR vs. CurNPs                   | 0.2462         | ns             |
| Control+NIR vs. C                        | 0.2879         | ns             |
| Control+NIR vs. CurNPs-C                 | 0.0629         | ns             |
| Control+NIR vs. CurNPs+NIR               | <0.0001        | ***            |
| Control+NIR vs. C+NIR                    | <0.0001        | ***            |
| Control+NIR vs. CurNPs-C+NIR             | <0.0001        | ***            |
| CurNPs vs. C                             | >0.9999        | ns             |
| CurNPs vs. CurNPs-C                      | 0.9774         | ns             |
| CurNPs vs. CurNPs+NIR                    | <0.0001        | ***            |
| CurNPs vs. C+NIR                         | <0.0001        | ***            |
| CurNPs vs. CurNPs-C+NIR                  | <0.0001        | ***            |
| C vs. CurNPs-C                           | 0.9597         | ns             |
| C vs. CurNPs+NIR                         | <0.0001        | ***            |
| C vs. C+NIR                              | <0.0001        | ***            |
| C vs. CurNPs-C+NIR                       | <0.0001        | ***            |
| CurNPs-C vs. CurNPs+NIR                  | <0.0001        | ***            |
| CurNPs-C vs. C+NIR                       | <0.0001        | ***            |
| CurNPs-C vs. CurNPs-C+NIR                | <0.0001        | ***            |
| CurNPs+NIR vs. C+NIR                     | 0.0002         | ***            |
| CurNPs+NIR vs. CurNPs-C+NIR              | <0.0001        | ***            |
| C+NIR vs. CurNPs-C+NIR                   | <0.0001        | ***            |

Statistical analysis was conducted by one-way ANOVA analysis followed by Tukey's post-test. The asterisk was considered as statistical significance ( $*p < 0.05$ ,  $**p < 0.01$ ,  $***p < 0.001$ ) and ns indicates no significance difference.

**Table S3.** P value and summary of comparison of each group in Figure 3C

| <b>Tukey's multiple comparisons test</b> | <b>P Value</b> | <b>Summary</b> |
|------------------------------------------|----------------|----------------|
| Control vs. $10^7$ C                     | 0.9992         | ns             |
| Control vs. $10^8$ C                     | 0.9982         | ns             |
| Control vs. $10^9$ C                     | 0.8126         | ns             |
| Control vs. Control +NIR                 | >0.9999        | ns             |
| Control vs. $10^7$ C+NIR                 | 0.9382         | ns             |
| Control vs. $10^8$ C+NIR                 | 0.2463         | ns             |
| Control vs. $10^9$ C+NIR                 | 0.0001         | ***            |
| $10^7$ C vs. $10^8$ C                    | >0.9999        | ns             |
| $10^7$ C vs. $10^9$ C                    | 0.9773         | ns             |
| $10^7$ C vs. Control +NIR                | 0.9999         | ns             |
| $10^7$ C vs. $10^7$ C+NIR                | 0.9983         | ns             |
| $10^7$ C vs. $10^8$ C+NIR                | 0.505          | ns             |
| $10^7$ C vs. $10^9$ C+NIR                | 0.0003         | ***            |
| $10^8$ C vs. $10^9$ C                    | 0.9861         | ns             |
| $10^8$ C vs. Control +NIR                | 0.9996         | ns             |
| $10^8$ C vs. $10^7$ C+NIR                | 0.9993         | ns             |
| $10^8$ C vs. $10^8$ C+NIR                | 0.5514         | ns             |
| $10^8$ C vs. $10^9$ C+NIR                | 0.0003         | ***            |
| $10^9$ C vs. Control +NIR                | 0.8713         | ns             |
| $10^9$ C vs. $10^7$ C+NIR                | >0.9999        | ns             |
| $10^9$ C vs. $10^8$ C+NIR                | 0.9538         | ns             |
| $10^9$ C vs. $10^9$ C+NIR                | 0.0017         | **             |
| Control +NIR vs. $10^7$ C+NIR            | 0.9666         | ns             |
| Control +NIR vs. $10^8$ C+NIR            | 0.2994         | ns             |
| Control +NIR vs. $10^9$ C+NIR            | 0.0001         | ***            |
| $10^7$ C+NIR vs. $10^8$ C+NIR            | 0.8431         | ns             |
| $10^7$ C+NIR vs. $10^9$ C+NIR            | 0.0009         | ***            |
| $10^8$ C+NIR vs. $10^9$ C+NIR            | 0.0134         | *              |

Statistical analysis was conducted by one-way ANOVA analysis followed by Tukey's post-test. The asterisk was considered as statistical significance (\* $p < 0.05$ , \*\* $p < 0.01$ , \*\*\* $p < 0.001$ ) and ns indicates no significance difference.

**Table S4.** P value and summary of comparison of each group in Figure 3D

| <b>Tukey's multiple comparisons test</b> | <b>P Value</b> | <b>Summary</b> |
|------------------------------------------|----------------|----------------|
| NIR- Control vs. NIR- C                  | 0.8592         | ns             |
| NIR- Control vs. NIR- CurNPs             | 0.5337         | ns             |
| NIR- Control vs. NIR- CurNPs-C           | 0.149          | ns             |
| NIR- Control vs. NIR+ Control            | >0.9999        | ns             |
| NIR- Control vs. NIR+ C                  | <0.0001        | ***            |
| NIR- Control vs. NIR+ CurNPs             | <0.0001        | ***            |
| NIR- Control vs. NIR+ CurNPs-C           | <0.0001        | ***            |
| NIR- C vs. NIR- CurNPs                   | 0.9985         | ns             |
| NIR- C vs. NIR- CurNPs-C                 | 0.8041         | ns             |
| NIR- C vs. NIR+ Control                  | 0.955          | ns             |
| NIR- C vs. NIR+ C                        | <0.0001        | ***            |
| NIR- C vs. NIR+ CurNPs                   | <0.0001        | ***            |
| NIR- C vs. NIR+ CurNPs-C                 | <0.0001        | ***            |
| NIR- CurNPs vs. NIR- CurNPs-C            | 0.9826         | ns             |
| NIR- CurNPs vs. NIR+ Control             | 0.71           | ns             |
| NIR- CurNPs vs. NIR+ C                   | <0.0001        | ***            |
| NIR- CurNPs vs. NIR+ CurNPs              | <0.0001        | ***            |
| NIR- CurNPs vs. NIR+ CurNPs-C            | <0.0001        | ***            |
| NIR- CurNPs-C vs. NIR+ Control           | 0.242          | ns             |
| NIR- CurNPs-C vs. NIR+ C                 | 0.0003         | ***            |
| NIR- CurNPs-C vs. NIR+ CurNPs            | <0.0001        | ***            |
| NIR- CurNPs-C vs. NIR+ CurNPs-C          | <0.0001        | ***            |
| NIR+ Control vs. NIR+ C                  | <0.0001        | ***            |
| NIR+ Control vs. NIR+ CurNPs             | <0.0001        | ***            |
| NIR+ Control vs. NIR+ CurNPs-C           | <0.0001        | ***            |
| NIR+ C vs. NIR+ CurNPs                   | 0.424          | ns             |
| NIR+ C vs. NIR+ CurNPs-C                 | <0.0001        | ***            |
| NIR+ CurNPs vs. NIR+ CurNPs-C            | <0.0001        | ***            |

Statistical analysis was conducted by one-way ANOVA analysis followed by Tukey's post-test. The asterisk was considered as statistical significance ( $*p < 0.05$ ,  $**p < 0.01$ ,  $***p < 0.001$ ) and ns indicates no significance difference.

**Table S5.** P value and summary of comparison of each group in Figure S4B

| <b>Tukey's multiple comparisons test</b> | <b>P Value</b> | <b>Summary</b> |
|------------------------------------------|----------------|----------------|
| C 6 h vs. C+NIR 6 h                      | <0.0001        | ***            |
| C 6 h vs. C 12 h                         | 0.0003         | ***            |
| C 6 h vs. C+NIR 12 h                     | <0.0001        | ***            |
| C+NIR 6 h vs. C 12 h                     | 0.0105         | *              |
| C+NIR 6 h vs. C+NIR 12 h                 | <0.0001        | ***            |
| C 12 h vs. C+NIR 12 h                    | <0.0001        | ***            |

Statistical analysis was conducted by one-way ANOVA analysis followed by Tukey's post-test. The asterisk was considered as statistical significance (\* $p < 0.05$ , \*\* $p < 0.01$ , \*\*\* $p < 0.001$ ).

**Table S6.** P value and summary of comparison of each group in Figure 4B

| <b>Tukey's multiple comparisons test</b> | <b>P Value</b> | <b>Summary</b> |
|------------------------------------------|----------------|----------------|
| CurNPs 6 h vs. CurNPs-C 6 h              | <0.0001        | ***            |
| CurNPs 6 h vs. CurNPs-C+NIR 6 h          | <0.0001        | ***            |
| CurNPs 6 h vs. CurNPs 12 h               | >0.9999        | ns             |
| CurNPs 6 h vs. CurNPs-C 12 h             | <0.0001        | ***            |
| CurNPs 6 h vs. CurNPs-C+NIR 12 h         | <0.0001        | ***            |
| CurNPs-C 6 h vs. CurNPs-C+NIR 6 h        | <0.0001        | ***            |
| CurNPs-C 6 h vs. CurNPs 12 h             | <0.0001        | ***            |
| CurNPs-C 6 h vs. CurNPs-C 12 h           | <0.0001        | ***            |
| CurNPs-C 6 h vs. CurNPs-C+NIR 12 h       | <0.0001        | ***            |
| CurNPs-C+NIR 6 h vs. CurNPs 12 h         | <0.0001        | ***            |
| CurNPs-C+NIR 6 h vs. CurNPs-C 12 h       | <0.0001        | ***            |
| CurNPs-C+NIR 6 h vs. CurNPs-C+NIR 12 h   | <0.0001        | ***            |
| CurNPs 12 h vs. CurNPs-C 12 h            | <0.0001        | ***            |
| CurNPs 12 h vs. CurNPs-C+NIR 12 h        | <0.0001        | ***            |
| CurNPs-C 12 h vs. CurNPs-C+NIR 12 h      | <0.0001        | ***            |

Statistical analysis was conducted by one-way ANOVA analysis followed by Tukey's post-test. The asterisk was considered as statistical significance (\* $p < 0.05$ , \*\* $p < 0.01$ , \*\*\* $p < 0.001$ ) and ns indicates no significance difference.

**Table S7.** P value and summary of comparison of each group in Figure 4D

| <b>Tukey's multiple comparisons test</b> | <b>P Value</b> | <b>Summary</b> |
|------------------------------------------|----------------|----------------|
| CurNPs vs. CurNPs-C                      | <0.0001        | ***            |
| CurNPs vs. CurNPs-C+NIR                  | <0.0001        | ***            |
| CurNPs-C vs. CurNPs-C+NIR                | <0.0001        | ***            |

Statistical analysis was conducted by one-way ANOVA analysis followed by Tukey's post-test. The asterisk was considered as statistical significance (\* $p < 0.05$ , \*\* $p < 0.01$ , \*\*\* $p < 0.001$ ).

**Table S8.** P value and summary of comparison of each group in Figure 4F

| <b>Tukey's multiple comparisons test</b> | <b>P Value</b> | <b>Summary</b> |
|------------------------------------------|----------------|----------------|
| CurNPs vs. CurNPs-C                      | 0.0042         | **             |
| CurNPs vs. CurNPs-C+NIR                  | <0.0001        | ***            |
| CurNPs-C vs. CurNPs-C+NIR                | 0.0005         | ***            |

Statistical analysis was conducted by one-way ANOVA analysis followed by Tukey's post-test. The asterisk was considered as statistical significance (\* $p < 0.05$ , \*\* $p < 0.01$ , \*\*\* $p < 0.001$ ).

**Table S9.** P value and summary of comparison of each group in Figure 5B

| <b>Two-tailed Student's t-tests</b> | <b>P Value</b> | <b>Summary</b> |
|-------------------------------------|----------------|----------------|
| PBS+NIR vs. C+NIR                   | 0.0303         | *              |
| PBS+NIR vs. CurNPs+NIR              | 0.1652         | ns             |
| PBS+NIR vs. CurNPs-C                | 0.0011         | **             |
| PBS+NIR vs. CurNPs-C+NIR            | <0.0001        | ***            |
| C+NIR vs. CurNPs+NIR                | 0.6419         | ns             |
| C+NIR vs. CurNPs-C                  | 0.2744         | ns             |
| C+NIR vs. CurNPs-C+NIR              | 0.0013         | **             |
| CurNPs+NIR vs. CurNPs-C             | 0.1949         | ns             |
| CurNPs+NIR vs. CurNPs-C+NIR         | 0.0043         | **             |
| CurNPs-C vs. CurNPs-C+NIR           | 0.0001         | ***            |

Statistical analysis was conducted by Student's t-tests. The asterisk was considered as statistical significance (\* $p < 0.05$ , \*\* $p < 0.01$ , \*\*\* $p < 0.001$ ) and ns indicates no significance difference.

**Table S10.** P value and summary of comparison of each group in Figure 5D

| <b>Two-tailed Student's t-tests</b> | <b>P Value</b> | <b>Summary</b> |
|-------------------------------------|----------------|----------------|
| PBS+NIR vs. C+NIR                   | 0.7068         | ns             |
| PBS+NIR vs. CurNPs+NIR              | 0.7946         | ns             |
| PBS+NIR vs. CurNPs-C                | 0.0268         | *              |
| PBS+NIR vs. CurNPs-C+NIR            | 0.0002         | ***            |
| C+NIR vs. CurNPs+NIR                | 0.9809         | ns             |
| C+NIR vs. CurNPs-C                  | 0.0804         | ns             |
| C+NIR vs. CurNPs-C+NIR              | 0.0011         | **             |
| CurNPs+NIR vs. CurNPs-C             | 0.1768         | ns             |
| CurNPs+NIR vs. CurNPs-C+NIR         | 0.01           | **             |
| CurNPs-C vs. CurNPs-C+NIR           | 0.0046         | **             |

Statistical analysis was conducted by Student's t-tests. The asterisk was considered as statistical significance (\* $p < 0.05$ , \*\* $p < 0.01$ , \*\*\* $p < 0.001$ ) and ns indicates no significance difference.

**Table S11.** P value and summary of comparison of each group in Figure S5B

| <b>Tukey's multiple comparisons test</b> | <b>P Value</b> | <b>Summary</b> |
|------------------------------------------|----------------|----------------|
| PBS+NIR vs. C+NIR                        | >0.9999        | ns             |
| PBS+NIR vs. CurNPs+NIR                   | >0.9999        | ns             |
| PBS+NIR vs. CurNPs-C                     | 0.0018         | **             |
| PBS+NIR vs. CurNPs-C+NIR                 | <0.0001        | ***            |
| C+NIR vs. CurNPs+NIR                     | >0.9999        | ns             |
| C+NIR vs. CurNPs-C                       | 0.0016         | **             |
| C+NIR vs. CurNPs-C+NIR                   | <0.0001        | ***            |
| CurNPs+NIR vs. CurNPs-C                  | 0.0017         | **             |
| CurNPs+NIR vs. CurNPs-C+NIR              | <0.0001        | ***            |
| CurNPs-C vs. CurNPs-C+NIR                | <0.0001        | ***            |

Statistical analysis was conducted by one-way ANOVA analysis followed by Tukey's post-test. The asterisk was considered as statistical significance (\* $p < 0.05$ , \*\* $p < 0.01$ , \*\*\* $p < 0.001$ ) and ns indicates no significance difference.
